# Supplementary material for: The Cardiac Glycoside Deslanoside Exerts Anticancer Activity in Prostate Cancer Cells by Modulating Multiple Signaling Pathways
Source: MDPI journal article supplement (doi:10.3390/cancers13225809), 2021-11-19
Supplement: s1 [file s1]

*Supplementary Materials*

# **The Cardiac Glycoside Deslanoside Exerts Anticancer Activity in Prostate Cancer Cells by Modulating Multiple Signaling Pathways**

Mingcheng Liu, Qingqing Huang, Jun A, Linyue Li, Xiawei Li, Zhiqian Zhang and Jin-Tang Dong

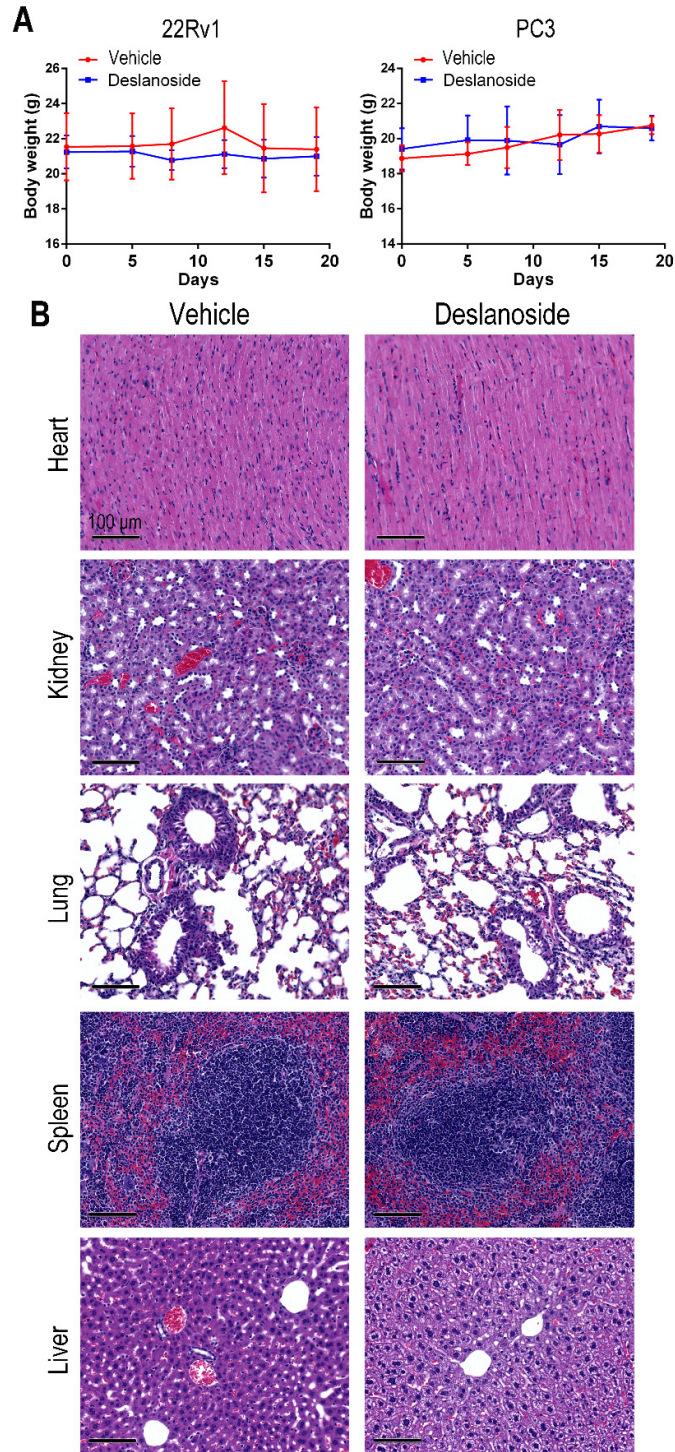

**Figure S1.** (A). Monitoring of mouse body weights during deslanoside treatment. Bodyweight was measured for each mouse carrying tumors from either 22Rv1 or PC-3 cell line at indicated days and plotted. (B). (H&E) staining of main organs from the mice. g, gram. Scale bars, 100  $\mu$ m.

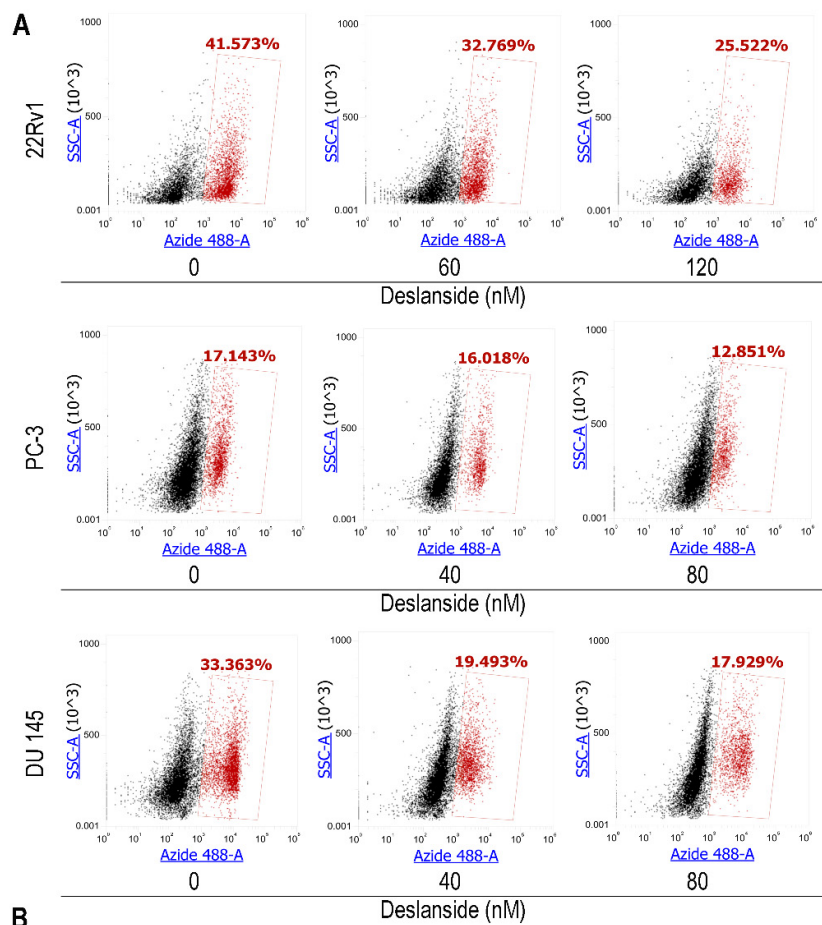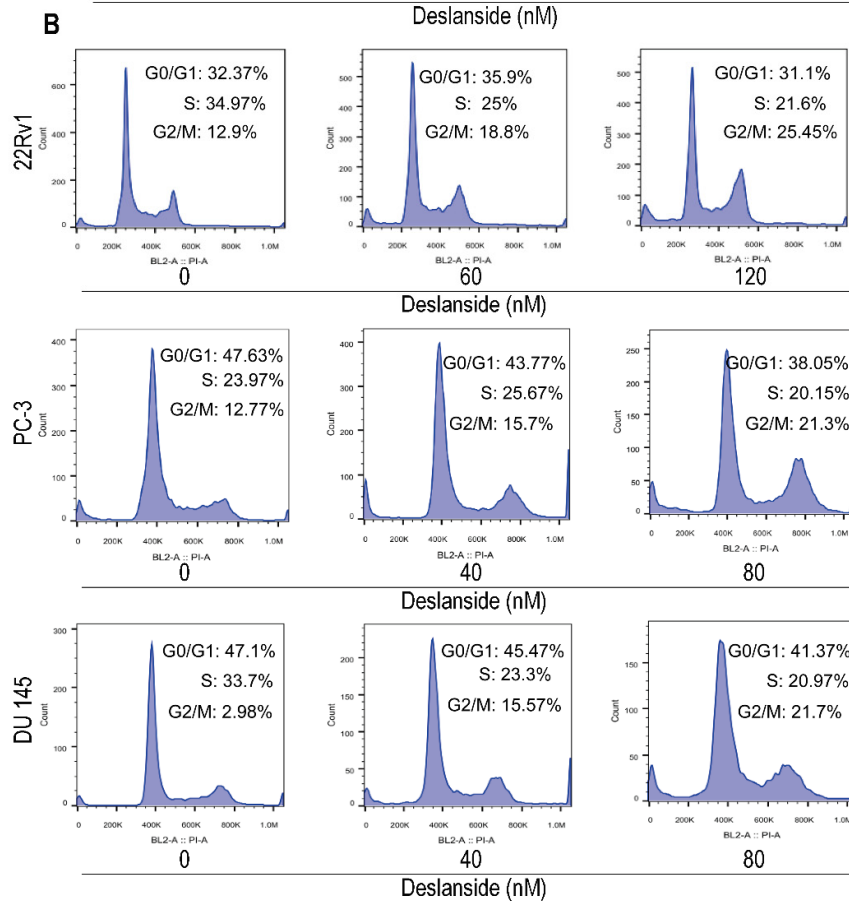

**Figure S2.** Representative FACS plots for EdU-labeled proliferating cells (A) and the cell cycle distributions (B) from flow cytometry analyses in 22Rv1, PC-3, and DU 145 PCa cells treated with deslanoside at indicated concentrations for 48 h. The Student's t-test was used for the statistical analysis.

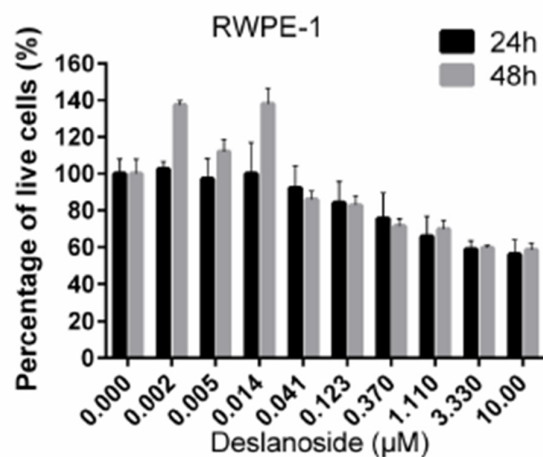

**Figure S3.** The effects of deslanoside on cell viability of RWPE-1 cell line, as determined by the CCK-8 assay in cells treated with indicated concentrations for 24 or 48 h.

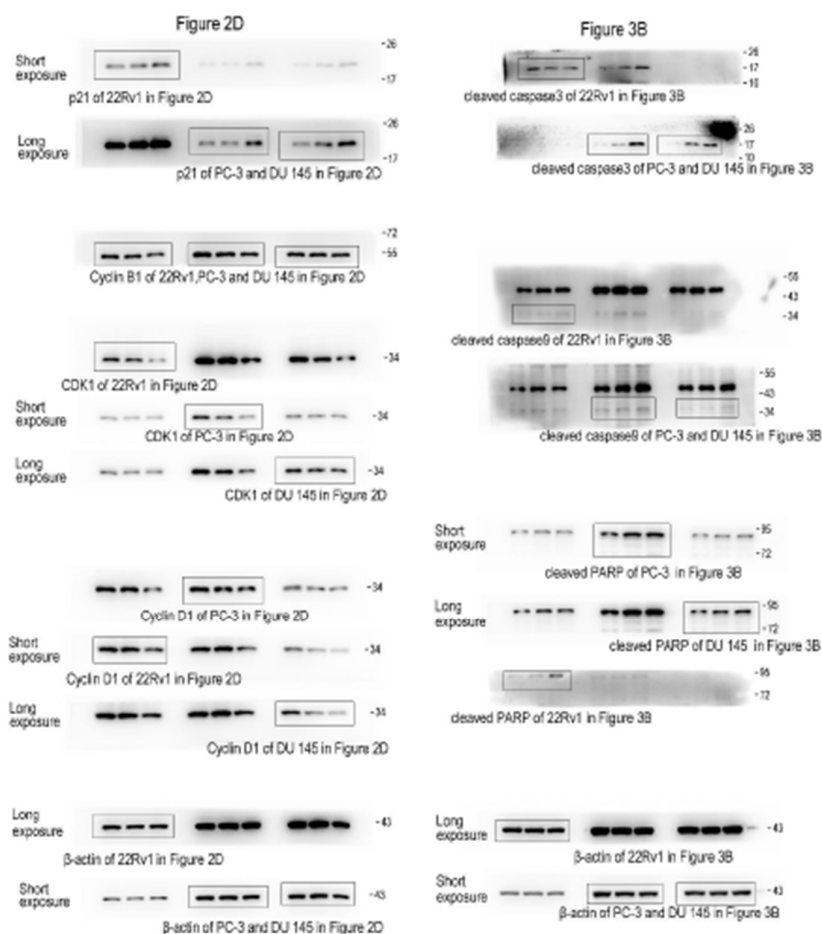

**Figure S4.** Unprocessed blot images for western blotting results.
